1     **Resistance to aztreonam in combination with non- $\beta$ -lactam  $\beta$ -lactamase inhibitors**  
2     **due to the layering of mechanisms in *Escherichia coli* identified following mixed**  
3     **culture selection.**

4  
5     Ching Hei Phoebe Cheung<sup>1</sup>, Punyawee Dulyayangkul<sup>1</sup>, Kate J. Heesom<sup>2</sup> & Matthew B.  
6     Avison<sup>1</sup>

7

8     <sup>1</sup>School of Cellular & Molecular Medicine, University of Bristol. UK

9     <sup>2</sup>Bristol University Proteomics Facility, University of Bristol. UK.

10

11

12     Running Head: aztreonam/ $\beta$ -lactamase inhibitor resistance

13 **Abstract**

14 Using mixed culture selection, we show how reduced envelope permeability, reduced  
15 target-site affinity, and increased  $\beta$ -lactamase production layer to confer  
16 aztreonam/ $\beta$ -lactamase inhibitor resistance in *Escherichia coli*. We report a clinical  
17 isolate producing CTX-M-15 and CMY-4, lacking OmpF, and carrying a PBP3  
18 mutation. It is resistant to aztreonam plus the inhibitors avibactam, relebactam and  
19 vaborbactam. Mobilisation of *bla*<sub>SHV-12</sub> into this isolate generated a derivative  
20 additionally resistant to aztreonam plus the bicyclic boronate inhibitors **2** and  
21 taniborbactam.

22 **Text**

23 The  $\beta$ -lactam-based class A  $\beta$ -lactamase inhibitors clavulanic acid and tazobactam  
24 are widely administered with penicillin derivatives and have had decades of clinical  
25 success (1, 2). However, class C and D  $\beta$ -lactamases are not affected by these  
26 inhibitors, and nor are class B, metallo- $\beta$ -lactamases, which provide resistance to a  
27 wide range of  $\beta$ -lactams including carbapenems (2). Non- $\beta$ -lactam based  $\beta$ -  
28 lactamase inhibitors recently introduced into clinical practice are avibactam,  
29 relebactam and vaborbactam, and these have a wider spectrum of activity than  
30 clavulanic acid or tazobactam, including many class C and some class D enzymes,  
31 but they do not inhibit class B enzymes (2). Brem *et al.* showed that bicyclic  
32 boronates are potent inhibitors of both serine- $\beta$ -lactamases (classes A, C and D) and  
33 the most common subclass of metallo- $\beta$ -lactamases, subclass B1 (3). Another  
34 bicyclic boronate “cross-class”  $\beta$ -lactamase inhibitor, VNRX-5133 is in phase 3  
35 clinical trials and known as taniborbactam (4).

36 Metallo- $\beta$ -lactamase producers are usually susceptible to aztreonam, because  
37 monobactams are very poor substrates for these enzymes (1). However, aztreonam  
38 is broken down by class A ESBLs and class C  $\beta$ -lactamases, so isolates carrying a  
39 metallo- $\beta$ -lactamase and one of these serine enzymes are typically aztreonam  
40 resistant. Therefore, a combination of aztreonam with a serine- $\beta$ -lactamase inhibitor  
41 has been proposed to kill bacteria carrying a metallo- $\beta$ -lactamase and a serine  
42 enzyme that hydrolyses aztreonam. The combination currently receiving most  
43 attention, and undergoing clinical trials is aztreonam/avibactam (3).

44 A study of 328 *Escherichia coli* resistant to third generation cephalosporins showed  
45 an aztreonam/avibactam MIC of  $\leq 0.25/4 \mu\text{g.ml}^{-1}$  in all except one isolate that carried  
46 CTX-M-15 (class A ESBL) and hyper-produced the chromosomal AmpC (class C

47 enzyme) against which the aztreonam/avibactam MIC was  $1/4 \mu\text{g.ml}^{-1}$  (5). Following  
48 on from this observation, we tested for reduced susceptibility (based on the CLSI  
49 broth microdilution protocol [6]) to aztreonam in combination with avibactam ( $4 \mu\text{g.ml}^{-1}$ )  
50  $^1$ ) and other recently released serine  $\beta$ -lactamase inhibitors relebactam ( $4 \mu\text{g.ml}^{-1}$ )  
51 and vaborbactam ( $8 \mu\text{g.ml}^{-1}$ ) against *E. coli* producing a CTX-M and a plasmid  
52 mediated AmpC (pAmpC) enzyme. In our collection of sequenced human *E. coli*, we  
53 located two relevant isolates. Urinary isolate 9969 (ST69) (7) carries genes encoding  
54 CTX-M-15 and CMY-60 (pAmpC). Bloodstream isolate N16 (ST101) (a gift from Prof  
55 Tim Walsh, University of Oxford) carries genes encoding CTX-M-15 and CMY-4.  
56 Against isolate 9969, all three inhibitors (purchased from MedChem Express)  
57 brought the aztreonam MIC back into the susceptible range, based on CSLI  
58 breakpoints (8). In contrast N16 was resistant to aztreonam in the presence of all  
59 three inhibitors (**Table 1**).

60 Analysis of whole genome sequence (WGS) data revealed an 8 bp insertion, leading  
61 to a frameshift in the *ompF* porin gene in N16. In 9969, *ompF* is wild-type, so we  
62 hypothesised that this loss of OmpF is the reason why N16 is resistant to aztreonam  
63 plus the inhibitors. To test this, we insertionally inactivated *ompF* in 9969 using  
64 pKNOCK suicide gene replacement (9). An *ompF* DNA fragment was amplified with  
65 Phusion High-Fidelity DNA Polymerase (NEB, UK) from *E. coli* 9969 genomic DNA  
66 using primers EC-*ompF*-KO-FW (5' CAAGGATCCTGATGGCCTGAACTTC 3') with  
67 BamHI restriction site, underlined, and EC-*ompF*-KO-RV (5'  
68 CAAGTCGACTTCAGACCAGTAGCC 3') with Sall restriction site, underlined,  
69 digested with BamHI and Sall and ligated into pKNOCK-GM at the same sites  
70 generating pKNOCK-GM::*ompF*. This was transferred into 9969 by conjugation from  
71 *E. coli* BW20767. Mutants were selected using cefoxitin ( $5 \mu\text{g.mL}^{-1}$ ) and gentamicin

72 (5  $\mu\text{g}.\text{mL}^{-1}$ ) and confirmed by PCR using primers EC-*ompF*-F (5'  
73 ATGATGAAGCGCAATAAT 3') and BT543 (5' TGACGCGTCCTCGGTAC 3'). Whilst  
74 disruption of *ompF* in isolate 9969 did increase the MIC of aztreonam, and of  
75 aztreonam with either relebactam or vaborbactam, it did not detectably raise the MIC  
76 of aztreonam in the presence of avibactam, nor did it confer resistance to aztreonam  
77 in the presence of any inhibitor (**Table 1**). We hypothesised that this susceptibility  
78 difference between N16 (an *ompF* mutant) and 9969*ompF* was due to higher level  
79 production of CMY and/or CTX-M in N16 versus 9969, and proteomics analysis,  
80 performed as described by us previously (10,11), showed slightly higher enzyme  
81 production in N16 versus 9969 (**Table 2**). To test whether producing high levels of  
82 CMY/CTX-M in an *ompF* mutant confers aztreonam/inhibitor resistance, susceptible  
83 *E. coli* ATCC25922 was transformed with the multi-copy plasmids pYT(*bla*<sub>CTX-M-15</sub>)  
84 and pSU18(*bla*<sub>CMY-2</sub>), made as previously described (10,12). We the generated an  
85 *ompF* mutant derivative of this ATCC25922 transformant as above, with the mutant  
86 selected on gentamicin (5  $\mu\text{g}.\text{mL}^{-1}$ ), cefoxitin (5  $\mu\text{g}.\text{mL}^{-1}$ ) and kanamycin (20  $\mu\text{g}.\text{mL}^{-1}$ ).  
87 Proteomics confirmed the average abundance of CMY was 0.48 per unit of  
88 ribosomal proteins for N16 and 3.44 for ATCC25922*ompF*(CTX-M-15,CMY-2) (n=3  
89 for both). For CTX-M-15, the average abundance was 0.44 per unit of ribosomal  
90 proteins for N16 and 1.27 for ATCC25922*ompF*(CTX-M-15,CMY-2), which was  
91 resistant to aztreonam/relebactam but not aztreonam/vaborbactam; the MIC of  
92 aztreonam in the presence of avibactam against ATCC25922*ompF*(CTX-M-15,CMY-  
93 2)remained very low (**Table 1**). Therefore, we conclude that slightly higher levels of  
94 CMY/CTX-M production is not the reason for aztreonam/avibactam resistance in  
95 isolate N16, even when combined with OmpF porin loss and there must be an  
96 additional mechanism. Further WGS analysis revealed a 12 nt tandem duplication in

97 *ftsI* in N16, predicted to cause the insertion of the amino acid sequence YRIN after  
98 proline 333 in PBP3. This aztreonam target site mutation has previously been seen  
99 in clinical isolates, and associated with elevated MICs of aztreonam, with and without  
100 avibactam (13-15). Accordingly, the collective effects of CTX-M-15 and CMY  
101 production, loss of OmpF and a target site mutation in PBP3 explain why N16 is  
102 resistant to aztreonam in the presence of all three serine  $\beta$ -lactamase inhibitors  
103 tested.

104 The cross-class bicyclic boronate inhibitor **2** inhibits pAmpCs and CTX-M  $\beta$ -  
105 lactamases (3,16). The aztreonam/avibactam resistant *E. coli* isolate N16 was  
106 susceptible (MIC = 4  $\mu\text{g}.\text{ml}^{-1}$ ) to aztreonam in the presence of 10  $\mu\text{g}.\text{ml}^{-1}$  of inhibitor  
107 **2**, synthesized according to the literature protocol (3) and kindly provided by Prof.  
108 Chris Schofield, University of Oxford. We then spent some considerable time trying  
109 to select N16 point mutants resistant to aztreonam/**2** but failed. During these  
110 attempts, N16 and a *K. pneumoniae* ST265 bloodstream isolate (also a gift from Prof  
111 Tim Walsh) were mistakenly inoculated into the same bottle containing cation  
112 adjusted Muller-Hinton broth (CA-MHB) and grown overnight without any antibiotic  
113 selection. **Table 2** lists the resistance gene and plasmid replicon carriage status of  
114 the two isolates. One hundred microlitres of the mixed overnight culture was plated  
115 onto Muller Hinton agar containing aztreonam at increasing concentrations plus  
116 inhibitor **2** at a fixed concentration of 10  $\mu\text{g}.\text{ml}^{-1}$ . Profuse growth was seen on all  
117 plates up to 16  $\mu\text{g}.\text{ml}^{-1}$  aztreonam, which is defined as resistant by CLSI (8). One  
118 aztreonam/**2** resistant *E. coli* colony was selected as representative; the MIC of  
119 aztreonam in the presence of 4  $\mu\text{g}.\text{ml}^{-1}$  of another cross-class bicyclic boronate  
120 inhibitor, taniborbactam (5) was 32  $\mu\text{g}.\text{ml}^{-1}$ , confirming that this N16 derivative is  
121 more generally aztreonam/inhibitor resistant.

122 Dye accumulation assays (17,18) showed that *E. coli* N16 and its resistant derivative  
123 had similar envelope permeability (**Figure 1**) and proteomic analysis showed no  
124 significant difference in the abundances of key porin and efflux pump proteins (**Table**  
125 **2**). WGS revealed that the complement of  $\beta$ -lactamases and plasmid replicon types  
126 in the resistant N16 derivative had increased compared with N16; an SHV-12  
127 encoding IncX3 plasmid had moved from the *K. pneumoniae* isolate into N16 during  
128 co-culture (**Table 2**). SHV-12 was produced at high levels in the N16 resistant  
129 derivative, and the abundances of the other resident  $\beta$ -lactamases was not  
130 significantly different from N16 (**Table 2**). Notably, whilst IncX3 plasmids have  
131 previously been seen to carry *bla*<sub>SHV-12</sub> and *bla*<sub>NDM</sub> (19), the *bla*<sub>NDM</sub> gene located in  
132 our *K. pneumoniae* donor isolate did not co-transfer with *bla*<sub>SHV-12</sub> into N16 (**Table 2**)  
133 and it has been reported previously that *bla*<sub>SHV-12</sub> has been identified on IncX3  
134 plasmids lacking *bla*<sub>NDM</sub> in *E. coli* (20).

135 Whilst *E. coli* N16 (and its resistant derivative) carry genes for *bla*<sub>TEM-1</sub> and *bla*<sub>OXA-2</sub>,  
136 only the former was detectably expressed (**Table 2**). WGS confirmed that *bla*<sub>OXA-2</sub> is  
137 chromosomally located (so is single copy), the third gene cassette in the integron (so  
138 is distant from the integron common promoter) and the integron promoter is of the  
139 weakest known designation (21), explaining its low-level expression.

140 We conclude, therefore, that in the absence of OmpF and with an aztreonam  
141 target site mutation in PBP3, the production of three  $\beta$ -lactamases (CMY-2, CTX-M-  
142 15, and SHV-12) that all hydrolyse aztreonam (1) from enzyme classes that bind  
143 bicyclic boronates (3,22) perhaps with a contribution from a resident TEM-1, which  
144 also binds bicyclic boronates (3) collectively overcome utility of aztreonam/2 and  
145 aztreonam/taniborbactam.

146 The fortuitous finding reported here has significant implications for the future of  
147 research into  $\beta$ -lactam/ $\beta$ -lactamase inhibitor resistance. It is known that  $\beta$ -lactamase  
148 hyperproduction – following gene duplication, promoter mutation, or mutations that  
149 stabilise the enzyme – can overcome  $\beta$ -lactam/ $\beta$ -lactamase inhibitor combinations  
150 (e.g., amoxicillin/clavulanate or ceftazidime/avibactam) (1,2,23) but clearly another  
151 way of increasing the abundance of  $\beta$ -lactamase activity in a cell is to acquire an  
152 additional  $\beta$ -lactamase gene from a neighbouring bacterium with similar substrate  
153 profile, as we have found here. This could never be seen when testing individual  
154 isolates for their ability to generate resistant derivatives; either in the lab or using in  
155 vivo infection models. However, in the real world, mixed populations of bacteria are  
156 found, increasing the potential for resistance to coalesce in one member of the  
157 population via horizontal gene transfer from the “ $\beta$ -lactamase-ome” of the population.  
158 Two final findings are relevant to note. First, the bicyclic boronate taniborbactam has  
159 been partnered with cefepime, not aztreonam in clinical development (5). The MIC of  
160 cefepime against *E. coli* isolate N16 in the presence of taniborbactam was  $4/4 \mu\text{g.ml}^{-1}$   
161 <sup>1</sup>, and this did not rise upon acquisition of *bla*<sub>SHV-12</sub> in the aztreonam/taniborbactam  
162 resistant N16 derivative. This MIC is in CLSI’s new “susceptible-dose dependent”  
163 range for cefepime (8). Second, prior to clinical approval, aztreonam/avibactam as a  
164 combination is created in the clinical setting by dosing aztreonam alongside  
165 ceftazidime/avibactam. Using checkerboard assays (**Fig. 2**) we noted that the  
166 aztreonam/avibactam resistant N16 and its aztreonam/taniborbactam resistant  
167 derivative are both susceptible (though sitting at the breakpoint) to  
168 ceftazidime/avibactam (MIC =  $8/4 \mu\text{g.ml}^{-1}$ ) even without aztreonam. The MIC versus  
169 N16 falls slightly to  $4/4 \mu\text{g.ml}^{-1}$  in the presence of a breakpoint concentration of  
170 aztreonam ( $4 \mu\text{g.ml}^{-1}$ ) but not against the aztreonam/taniborbactam resistant N16



171 derivative. Accordingly, in addition to the use of carbapenems (provided a metallo- $\beta$ -  
172 lactamase is not also present), it may be possible to treat infections with isolates  
173 having the same combination of  $\beta$ -lactam resistance mechanisms as N16 or its  
174 aztreonam/bicyclic boronate resistant derivative by using ceftazidime/avibactam (with  
175 or without aztreonam) or cefepime/taniborbactam but correct dosing may be difficult  
176 to achieve because the observed MICs are so close to the breakpoints.

177

### 178 **Acknowledgments**

179 This work was funded by grants MR/N013646/1 to M.B.A. and K.J.H. and  
180 MR/S004769/1 to M.B.A. from the Antimicrobial Resistance Cross Council Initiative  
181 supported by the seven United Kingdom research councils and the National Institute  
182 for Health Research. Additional funding came via a bequest from the estate of the  
183 late Professor Graham Ayliffe. Genome sequencing was provided by MicrobesNG  
184 (<http://www.microbesng.uk/>).

185

186 **We declare no conflicts of interest.**

187 **Figure Legends**

188

189 **Figure 1: The accumulation of H33342 dye over a 30 cycle (4500 s) incubation**  
190 **period by *K. pneumoniae* and *E. coli* isolates.** Red line, *K. pneumoniae* ST625  
191 donor isolate; blue line, *E. coli* N16; green line, *E. coli* N16 resistant derivative. In  
192 each case, fluorescence of cells incubated with the dye is presented as an absolute  
193 value after each cycle. Each line shows mean data for three biological replicates with  
194 8 technical replicates in each. Error bars define the standard error of the mean.

195

196 **Figure 2: Checkerboard assays for ceftazidime aztreonam in the presence of**  
197 **avibactam.**

198 Each image represents triplicate assays for an 8x8 array of wells in a 96-well plate. All wells  
199 contained CA-MHB including avibactam ( $4 \mu\text{g.mL}^{-1}$ ). A serial dilution of aztreonam (ATM, x-  
200 axis) and ceftazidime (CAZ, y-axis) was created from  $32 \mu\text{g.mL}^{-1}$  in each plate as recorded.  
201 All wells were inoculated with a suspension of bacteria, made as per CLSI microtiter MIC  
202 guidelines (6), and the plate was incubated at  $37^{\circ}\text{C}$  for 20 h. Growth was recorded by  
203 measuring  $\text{OD}_{600}$  and growth above background (broth) is recorded as a yellow block.  
204 Growth at  $8 \mu\text{g.mL}^{-1}$  ceftazidime and  $4 \mu\text{g.mL}^{-1}$  aztreonam (this position indicated in red) in  
205 the presence of avibactam defines resistance based on CLSI breakpoints (8). Bacterial  
206 suspensions used were N16, left hand image, and the N16 derivative selected for  
207 aztreonam/bicyclic boronate resistance, right hand image.

208 **Tables**

209 **Table 1 MIC ( $\mu\text{g}\cdot\text{ml}^{-1}$ ) of Aztreonam with and without serine  $\beta$ -lactamase**

210 **inhibitors against *E. coli* isolates and mutant derivatives.**

| Isolate/<br>Mutant                                | Aztreonam  | Aztreonam/<br>avibactam | Aztreonam/<br>relebactam | Aztreonam/<br>vaborbactam |
|---------------------------------------------------|------------|-------------------------|--------------------------|---------------------------|
| 9969                                              | 16         | $\leq 0.5/4$            | $\leq 0.5/4$             | $\leq 0.5/8$              |
| 9969 <i>ompF</i>                                  | 128        | $\leq 0.5/4$            | 1/4                      | 2/8                       |
| N16                                               | >256       | 8/4                     | 64/4                     | 128/8                     |
| ATCC<br>25922                                     | $\leq 0.5$ | $\leq 0.5/4$            | $\leq 0.5/4$             | $\leq 0.5/8$              |
| ATCC<br>25922<br><i>ompF</i><br>CMY-2<br>CTX-M-15 | >256       | $\leq 0.5/4$            | 8/4                      | 2/8                       |

11 **Table 2.** Genotypic and Phenotypic Properties of *E. coli* and *K. pneumoniae* isolates.

| Species and Sequence Type                                                         | Resistance gene complement (abundance of protein in proteome. Mean +/- SD normalised to average ribosomal protein, n=3)                                                                                                                                                                                                                                                                                                                                                                           | Plasmid replicon complement                                                  |
|-----------------------------------------------------------------------------------|---------------------------------------------------------------------------------------------------------------------------------------------------------------------------------------------------------------------------------------------------------------------------------------------------------------------------------------------------------------------------------------------------------------------------------------------------------------------------------------------------|------------------------------------------------------------------------------|
| <i>E. coli</i> ST69<br><b>(9969)</b>                                              | <i>dfrA7</i> , <i>qnrS1</i> , <i>strA</i> , <i>strB</i> , <i>sul1</i> , <i>sul2</i><br><i>bla</i> <sub>CMY-60</sub> (0.47 +/- 0.05)<br><i>bla</i> <sub>CTX-M-15</sub> (0.26 +/- 0.02)<br><i>bla</i> <sub>TEM-1</sub> (0.04 +/- 0.001)<br><i>ompF</i> (1.07 +/- 0.08)<br><i>ompC</i> (1.91 +/- 0.01)                                                                                                                                                                                               | IncFII,<br>IncFIB(AP001918),<br>IncFIA,<br>IncB/O/K/Z,<br>IncQ1,<br>ColIRNAI |
| <i>E. coli</i> ST101<br><b>(N16)</b>                                              | <i>aadA2</i> , <i>rmtB</i> , <i>strB</i> , <i>strA</i> , <i>armA</i> , <i>aac(3)-IIa</i> , <i>mph(E)</i> , <i>msr(E)</i> , <i>sul1</i> , <i>dfrA12</i> , <i>dfrA29</i> , <i>catA1</i><br><i>bla</i> <sub>CMY-4</sub> (0.85 +/- 0.22)<br><i>bla</i> <sub>CTX-M-15</sub> (0.36 +/- 0.07)<br><i>bla</i> <sub>TEM-1</sub> (0.70 +/- 0.20)<br><i>bla</i> <sub>OXA-2</sub> (Not Detectable)<br><i>ompF</i> (Not Detectable)<br><i>ompC</i> (4.48 +/- 0.78)                                              | IncFII,<br>IncA/C2,<br>IncR<br>IncAC[ST-1],<br>IncF[F2:A-B-]                 |
| <i>K. pneumoniae</i> ST625                                                        | <i>aadA2</i> , <i>aac(6')Ib-cr</i> , <i>aac(3)-IIa</i> , <i>strA</i> , <i>strB</i> , <i>rmtB</i> , <i>fosA</i> , <i>mph(A)</i> , <i>sul2</i> , <i>sul1</i> , <i>dfrA12</i> , <i>aac(6')Ib-cr</i> , <i>qnrB7</i> , <i>qnrS1</i> , <i>tet(G)</i> , <i>catB4</i> , <i>catA2</i><br><i>bla</i> <sub>SHV-12</sub><br><i>bla</i> <sub>NDM-1</sub><br><i>bla</i> <sub>CTX-M-15</sub><br><i>bla</i> <sub>OKP-A-1</sub><br><i>bla</i> <sub>OXA-1</sub>                                                     | IncX3,<br>IncFII(pCRY),<br>IncFIB(K),<br>ColIRNAI<br>IncF[K:A-B-]            |
| <i>E. coli</i> ST101<br><b>(Aztreonam/<br/>Boronate Resistant<br/>derivative)</b> | <i>aadA2</i> , <i>rmtB</i> , <i>strB</i> , <i>strA</i> , <i>armA</i> , <i>aac(3)-IIa</i> , <i>mph(E)</i> , <i>msr(E)</i> , <i>sul1</i> , <i>dfrA12</i> , <i>dfrA29</i> , <i>catA1</i><br><i>bla</i> <sub>SHV-12</sub> (0.30 +/- 0.11)<br><i>bla</i> <sub>CMY-4</sub> (0.70 +/- 0.26)<br><i>bla</i> <sub>CTX-M-15</sub> (0.31 +/- 0.07) <i>bla</i> <sub>TEM-1</sub> (0.66 +/- 0.37)<br><i>bla</i> <sub>OXA-2</sub> (Not Detectable)<br><i>ompF</i> (Not Detectable)<br><i>ompC</i> (2.95 +/- 1.63) | IncX3<br>IncFII,<br>IncA/C2,<br>IncR<br>IncAC[ST-1],<br>IncF[F2:A-B-]        |

12

13

14 **Figure 1**

15 275

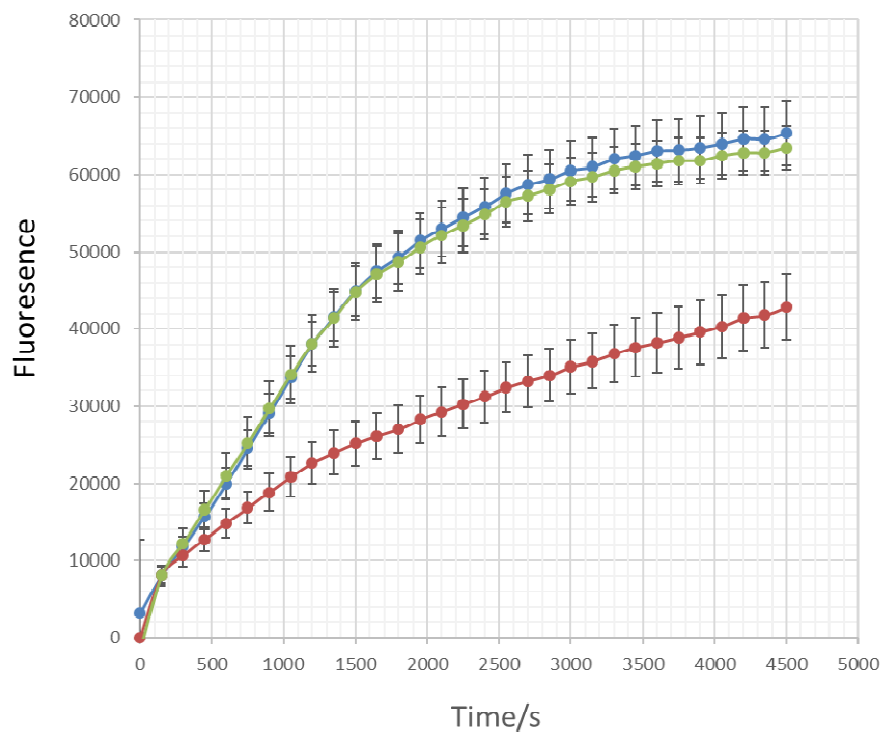

16 276

17

18



## 23 References

- 24 1. Bush K. 2018. Past and Present Perspectives on  $\beta$ -Lactamases. *Antimicrob Agents*  
25 *Chemother* 62:e01076-18.
- 26 2. Bush K, Bradford PA. 2019. Interplay between  $\beta$ -lactamases and new  $\beta$ -lactamase  
27 inhibitors. *Nat Rev Microbiol* 17:295-306.
- 28 3. Brem J, Cain R, Cahill S, McDonough MA, Clifton IJ, Jiménez-Castellanos JC,  
29 Avison MB, Spencer J, Fishwick CW, Schofield CJ. 2016. Structural basis of metallo- $\beta$ -  
30 lactamase, serine- $\beta$ -lactamase and penicillin-binding protein inhibition by cyclic  
31 boronates. *Nat Commun.* 7:12406.
- 32 4. Hamrick JC, Docquier JD, Uehara T, Myers CL, Six DA, Chatwin CL, John KJ,  
33 Vernacchio SF, Cusick SM, Trout REL, Pozzi C, De Luca F, Benvenuti M, Mangani S,  
34 Liu B, Jackson RW, Moeck G, Xerri L, Burns CJ, Pevear DC, Daigle DM. 2020. VNRX-  
35 5133 (Taniborbactam), a Broad-Spectrum Inhibitor of Serine- and Metallo- $\beta$ -  
36 Lactamases, Restores Activity of Cefepime in *Enterobacterales* and *Pseudomonas*  
37 *aeruginosa*. *Antimicrob Agents Chemother.* 64:e01963-19.
- 38 5. Mischnik A, Baumert P, Hamprecht A, Rohde A, Peter S, Feihl S, Knobloch J, Gölz  
39 H, Kola A, Obermann B, Querbach C, Willmann M, Gebhardt F, Tacconelli E,  
40 Gastmeier P, Seifert H, Kern WV; DZIF-ATHOS Study Group. 2017. Susceptibility to  
41 cephalosporin combinations and aztreonam/avibactam among third-generation  
42 cephalosporin-resistant Enterobacteriaceae recovered on hospital admission. *Int J*  
43 *Antimicrob Agents.* 49:239-242.
- 44 6. Clinical and Laboratory Standards Institute. 2015. M07-A10. Methods for dilution  
45 antimicrobial susceptibility tests for bacteria that grow aerobically; approved standard,  
46 10th ed. Clinical and Laboratory Standards Institute, Wayne, PA.

- 47 7. Findlay J, Gould VC, North P, Bowker KE, Williams MO, MacGowan AP, Avison MB.  
48 2020. Characterization of cefotaxime-resistant urinary *Escherichia coli* from primary  
49 care in South-West England 2017-18. J Antimicrob Chemother. 2020 75:65-71.
- 50 8. Clinical and Laboratory Standards Institute. 2020. M100-S30. Performance  
51 standards for antimicrobial susceptibility testing; thirtieth informational supplement. An  
52 informational supplement for global application developed through the Clinical and  
53 Laboratory Standards Institute consensus process. Clinical and Laboratory Standards  
54 Institute, Wayne, PA.
- 55 9. Alexeyev MF. 1999. The pKNOCK series of broad-host-range mobilizable suicide  
56 vectors for gene knockout and targeted DNA insertion into the chromosome of gram-  
57 negative bacteria. BioTechniques 26:824-828.
- 58 10. Jiménez-Castellanos JC, Wan Nur Ismah WAK, Takebayashi Y, Findlay J,  
59 Schneiders T, Heesom KJ, Avison MB. 2018. Envelope proteome changes driven by  
60 RamA overproduction in *Klebsiella pneumoniae* that enhance acquired  $\beta$ -lactam  
61 resistance. J Antimicrob Chemother 73:88-94.
- 62 11. Takebayashi Y, Wan Nur Ismah WAK, Findlay J, Heesom KJ, Zhang J, Williams  
63 OM, MacGowan AP, Avison MB. 2017. Prediction of cephalosporin and carbapenem  
64 susceptibility in multi-drug resistant Gram-negative bacteria using liquid  
65 chromatography-tandem mass spectrometry. *BioRxiv* <https://doi.org/10.1101/138594>.
- 66 12. Dulyayangkul P, Douglas EJA, Lastovka F, Avison MB. 2020. Resistance to  
67 Ceftazidime/Avibactam plus Meropenem/Vaborbactam When Both Are Used Together  
68 Is Achieved in Four Steps in Metallo- $\beta$ -Lactamase-Negative *Klebsiella pneumoniae*.  
69 Antimicrob Agents Chemother. 64:e00409-20.



- 70 13. Alm RA, Johnstone MR, Lahiri SD. 2015. Characterization of *Escherichia coli* NDM  
71 isolates with decreased susceptibility to aztreonam/avibactam: role of a novel insertion  
72 in PBP3. *J Antimicrob Chemother.* 70:1420-8.
- 73 14. Sadek M, Juhas M, Poirel L, Nordmann P. 2020. Genetic Features Leading to  
74 Reduced Susceptibility to Aztreonam-Avibactam among Metallo- $\beta$ -Lactamase-  
75 Producing *Escherichia coli* Isolates. *Antimicrob Agents Chemother.* 64:e01659-20.
- 76 15. Periasamy H, Joshi P, Palwe S, Shrivastava R, Bhagwat S, Patel M. 2020. High  
77 prevalence of *Escherichia coli* clinical isolates in India harbouring four amino acid  
78 inserts in PBP3 adversely impacting activity of aztreonam/avibactam. *J Antimicrob  
79 Chemother.* 75:1650-1651.
- 80 16. Cahill ST, Tyrrell JM, Navratilova IH, Calvopiña K, Robinson SW, Lohans CT,  
81 McDonough MA, Cain R, Fishwick CWG, Avison MB, Walsh TR, Schofield CJ, Brem J.  
82 2019. Studies on the inhibition of AmpC and other  $\beta$ -lactamases by cyclic boronates.  
83 *Biochim Biophys Acta Gen Subj.* 1863:742-748.
- 84 17. Coldham NG, Webber M, Woodward MJ, Piddock LJ. 2010. A 96-well plate  
85 fluorescence assay for assessment of cellular permeability and active efflux in  
86 *Salmonella enterica* serovar Typhimurium and *Escherichia coli*. *J Antimicrob  
87 Chemother.* 65:1655-63.
- 88 18. Wan Nur Ismah WAK, Takebayashi Y, Findlay J, Heesom KJ, Jiménez-Castellanos  
89 JC, Zhang J, Graham L, Bowker K, Williams OM, MacGowan AP, Avison MB. 2018.  
90 Prediction of Fluoroquinolone Susceptibility Directly from Whole-Genome Sequence  
91 Data by Using Liquid Chromatography-Tandem Mass Spectrometry to Identify Mutant  
92 Genotypes. *Antimicrob Agents Chemother.* 62:e01814-17.

- 93 19. Feng Y, Yang P, Xie Y, Wang X, McNally A, Zong Z. 2015. *Escherichia coli* of  
94 sequence type 3835 carrying bla NDM-1, bla CTX-M-15, bla CMY-42 and bla SHV-12.  
95 Sci Rep 5:12275.
- 96 20. Liakopoulos A, van der Goot J, Bossers A, Betts J, Brouwer MSM, Kant A, Smith H,  
97 Ceccarelli D, Mevius D. 2018. Genomic and functional characterisation of IncX3  
98 plasmids encoding blaSHV-12 in *Escherichia coli* from human and animal origin. Sci  
99 Rep. 8:7674.
- 00 21. Jové T, Da Re S, Denis F, Mazel D, Ploy MC. 2010. Inverse correlation between  
01 promoter strength and excision activity in class 1 integrons. PLoS Genet. 6:e1000793.
- 02 22. Cahill ST, Cain R, Wang DY, Lohans CT, Wareham DW, Oswin HP, Mohammed J,  
03 Spencer J, Fishwick CW, McDonough MA, Schofield CJ, Brem J. 2017. Cyclic  
04 Boronates Inhibit All Classes of  $\beta$ -Lactamases. Antimicrob Agents Chemother.  
05 61:e02260-16.
- 06 23. Rodríguez-Baño J, Oteo J, Ortega A, Villar M, Conejo MC, Bou G, Aranzamendi-  
07 Zaldumbide M, Cercenado E, Gurguí M, Martínez-Martínez L, Merino M, Rivera A,  
08 Oliver A, Weber I, Pascual A, Bartolomé RM, González-López JJ, Campos J. 2013.  
09 Epidemiological and clinical complexity of amoxicillin-clavulanate-resistant *Escherichia*  
10 *coli*. J Clin Microbiol. 51:2414-7.

11
